# Supplementary material for: Direct tuning of large-gap quantum spin Hall effect in mono transition metal carbide MXenes
Source: Royal Society of Chemistry journal article supplement (doi:10.1039/d2ta07161d), 2022-01-01
Supplement: d2ta07161d1.pdf [file d2ta07161d1.pdf]

## Supporting Information

### Direct Tuning of Large-Gap Quantum Spin Hall Effect in Mono-Transition Metal Carbide MXenes

Tao Yang<sup>\*,†</sup>, Qingmeng Wang<sup>†</sup>, Zhi Liu<sup>†</sup>, Jian Fang<sup>†</sup>, Xiaolan Chen<sup>\*,†</sup>, Xiaomin Cheng<sup>\*,†,‡</sup>

<sup>†</sup> *Institute of Advanced Materials, School of Electromechanical and Automobile Engineering, Huanggang Normal University, Huanggang, Hubei, 438000, China*

<sup>‡</sup> *School of Materials Science and Engineering, Wuhan University of Technology, Wuhan 430070, China*

Corresponding Author

Tao Yang: [yangtao@hgnu.edu.cn](mailto:yangtao@hgnu.edu.cn)

Xiaolan Chen: [chenxiaolan@hgnu.edu.cn](mailto:chenxiaolan@hgnu.edu.cn)

Xiaomin Cheng: [chengxm@whut.edu.cn](mailto:chengxm@whut.edu.cn)

Supporting information consists of 5 Figures (Figure S1-S7) and 2 Tables (Table S1-S2).

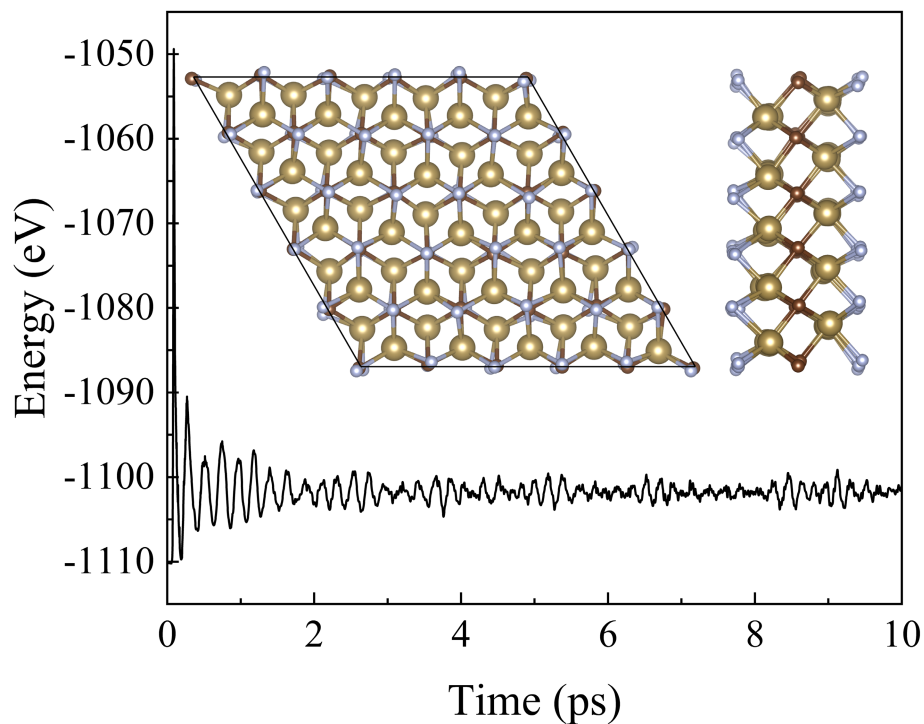

**Figure S1.** Fluctuations of total energies of Ta<sub>2</sub>CF<sub>2</sub> monolayer and a snapshot of the equilibrium structure at the end of 10 ps MD simulations at the temperature of 500 K.

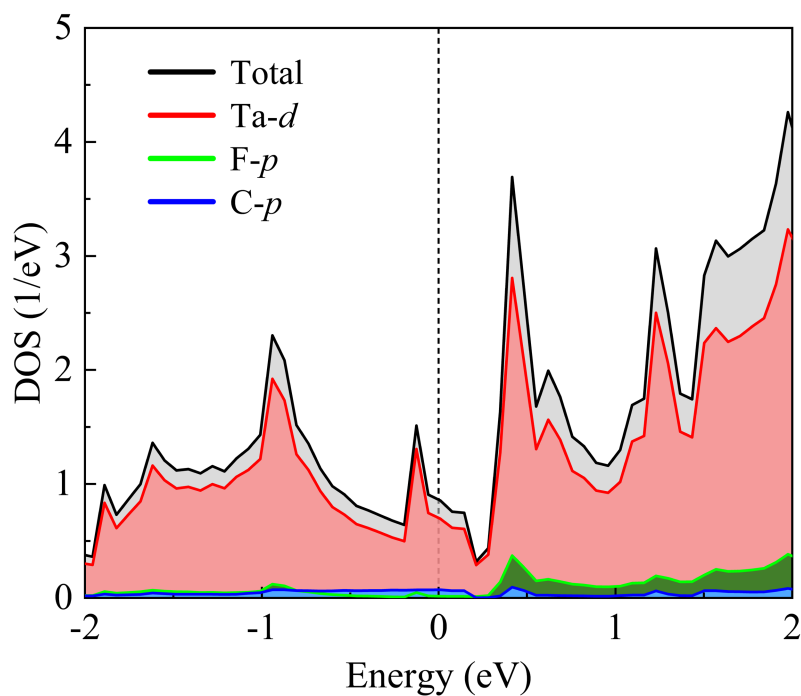

**Figure S2.** The projected partial densities of states (PDOS) of atoms orbitals with SOC by using the PBE functionals.

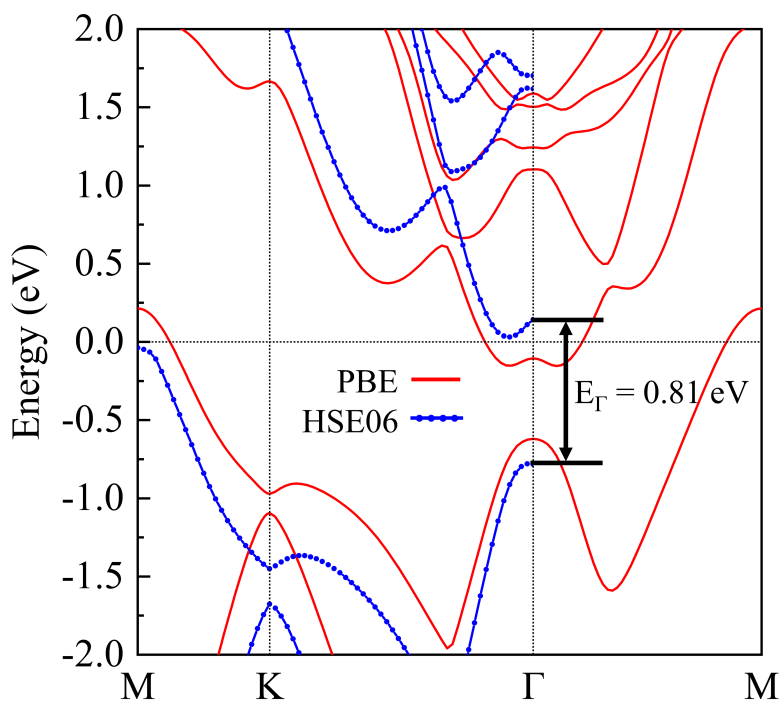

**Figure S3.** Band structure for Ta<sub>2</sub>CF<sub>2</sub> monolayer calculated with SOC by using the PBE (red lines) and HSE06 (blue lines) functionals.

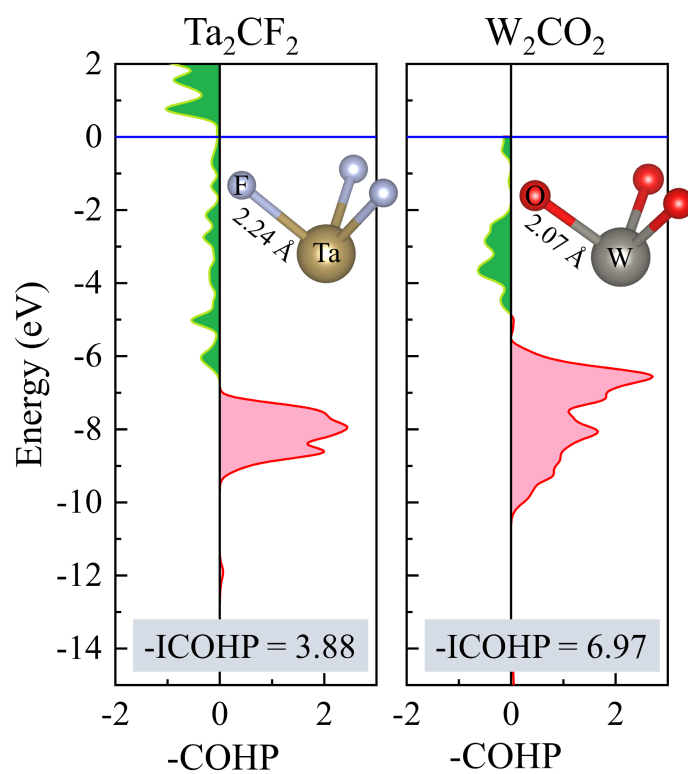

**Figure S4.** The -COHP and -ICOHP values for chemical bonds in the Ta<sub>2</sub>CF<sub>2</sub> and W<sub>2</sub>CO<sub>2</sub> monolayer. The pink color corresponds to bonding states, and green color corresponds to antibonding states.

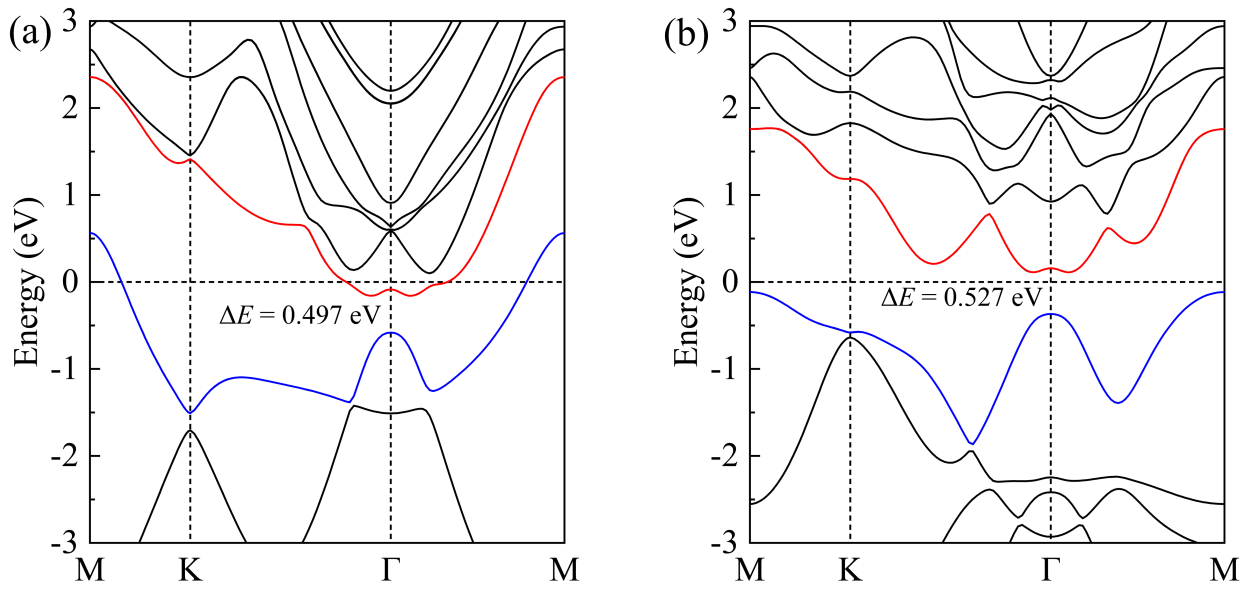

**Figure S5.** The electronic band structures of Ta<sub>2</sub>CF<sub>2</sub> monolayer under the thickness ( $\Delta h$ ) of 4.79 Å (a) and 6.39 Å (b) between F and F atoms, respectively.

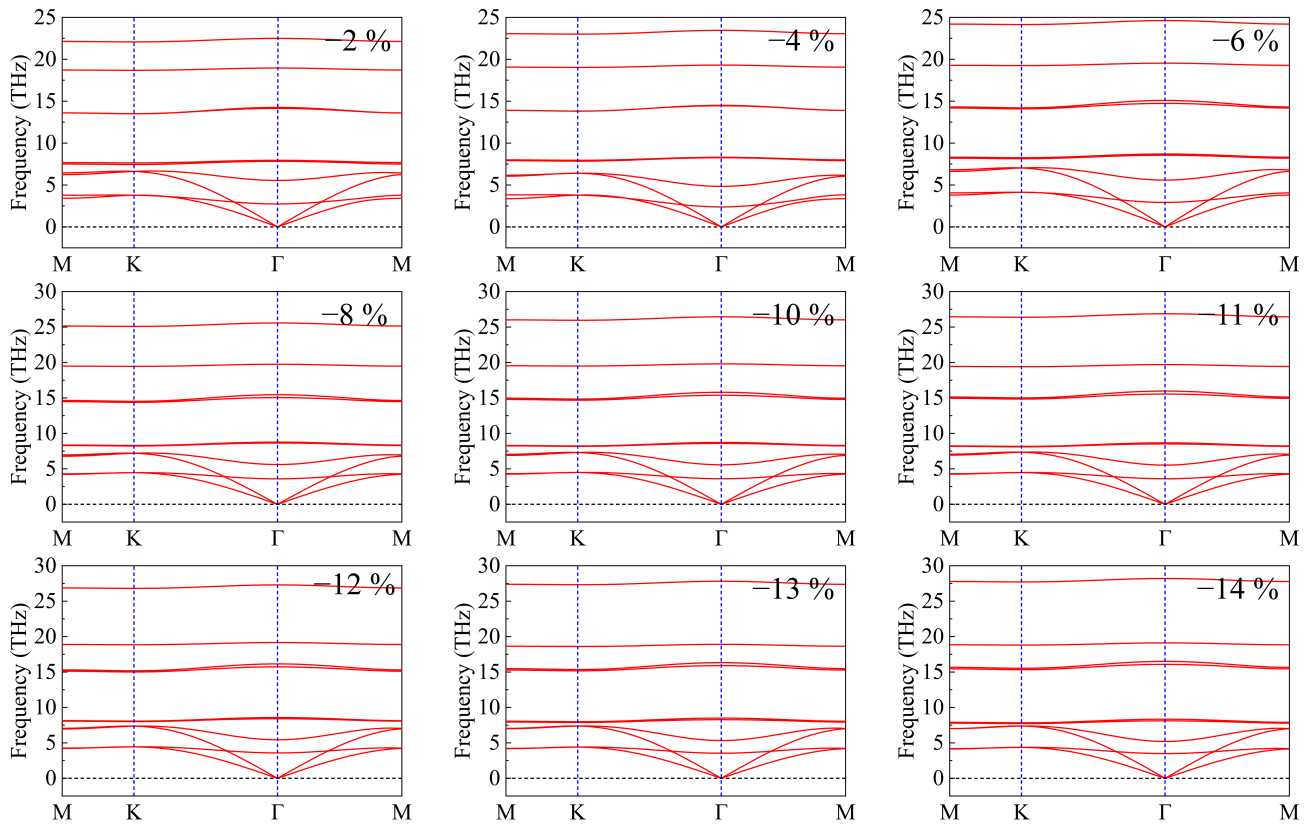

**Figure S6.** The phonon spectrum of Ta<sub>2</sub>CF<sub>2</sub> monolayer under different hydrostatic strains (the compressing of the lattice from 2% to 14%).

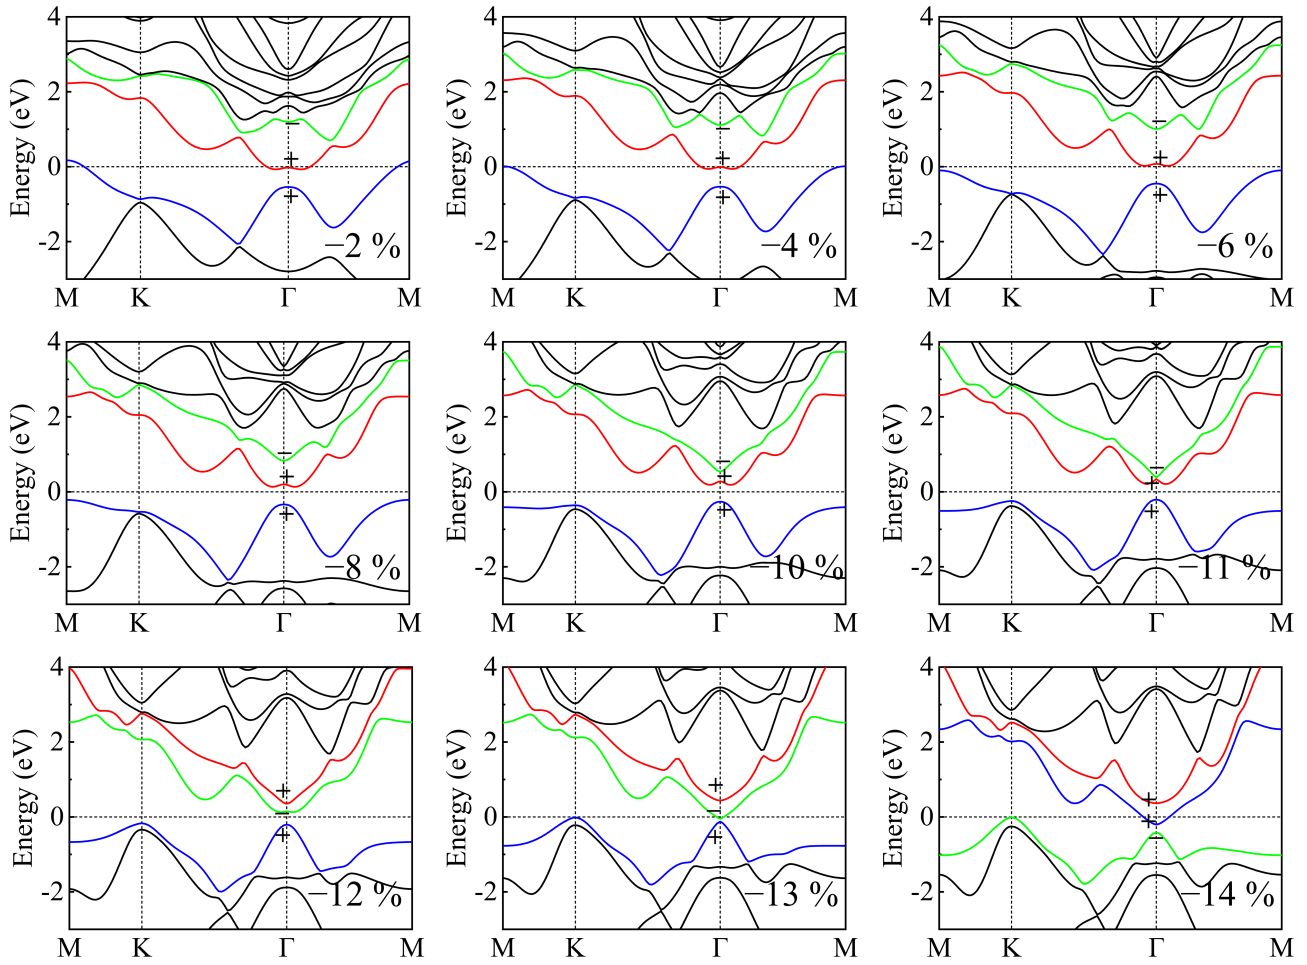

**Figure S7.** The electronic band structures of  $\text{Ta}_2\text{CF}_2$  monolayer under different hydrostatic strains by using the PBE functionals (the compressing of the lattice from 2% to 14%), the evolution for the relative parameters is shown in Table S2. Parities of the Bloch states at the  $\Gamma$ -point are denoted by +, -.

**Table S1.** In different GGA+ $U$  studies, the nontrivial gaps at the  $\Gamma$ -point ( $E_{\Gamma}$ ) under the thickness ( $\Delta h$ ) of 4.79 Å, 5.59 Å and 6.39 Å, respectively.

| $\Delta h$ | $U = 0$  | $U = 1$  | $U = 2$  |
|------------|----------|----------|----------|
| 4.79 Å     | 0.497 eV | 0.533 eV | 0.573 eV |
| 5.59 Å     | 0.515 eV | 0.564 eV | 0.631 eV |
| 6.39 Å     | 0.527 eV | 0.597 eV | 0.687 eV |

**Table S2.** Lattice parameters ( $a$ ), thickness of F and F atoms ( $\Delta h$ ), nontrivial gaps at the  $\Gamma$ -point ( $E_{\Gamma}$ ), and  $\mathbb{Z}_2$  topological invariants for the Ta<sub>2</sub>CF<sub>2</sub> monolayer under different hydrostatic strains. The values of  $E_{\Gamma}$  calculated using the PBE functional.

| Strains (%) | $a$ (Å) | $\Delta h$ (Å) | $E_{\Gamma}$ (eV) | $\mathbb{Z}_2$ |
|-------------|---------|----------------|-------------------|----------------|
| 0           | 2.97    | 5.59           | 0.515             | 1              |
| -2          | 2.91    | 5.66           | 0.518             | 1              |
| -4          | 2.85    | 5.74           | 0.523             | 1              |
| -6          | 2.79    | 5.83           | 0.528             | 1              |
| -8          | 2.73    | 5.92           | 0.536             | 1              |
| -10         | 2.68    | 6.02           | 0.546             | 1              |
| -11         | 2.65    | 6.07           | 0.551             | 1              |
| -12         | 2.62    | 6.12           | 0.353             | 1              |
| -13         | 2.59    | 6.18           | 0.074             | 1              |
| -14         | 2.56    | 6.24           | 0.211             | 0              |
